# Supplementary material for: Cloning, Expression, and Characterization of Xylanase G2 from Aspergillus oryzae VTCC‐F187 in Aspergillus niger VTCC‐F017
Source: Hindawi journal article supplement (doi:10.1155/2021/8840038), 2021-01-01
Supplement: f1 [file 8840038.f1.doc]

| 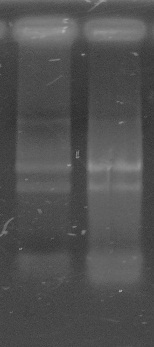 1 | 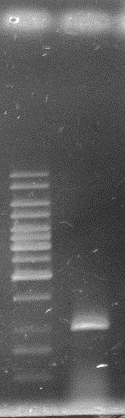 M 1  750  1000  2000  bp  500 | 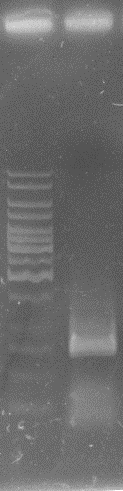 M 1  500  750  1000  2000  bp |
| --- | --- | --- |
| A | B | C |
| **Supplement 1.** The agarose gel electrophoresis of total RNA (A); PCR product *xlnG2* (B); PCR product from the with foreign gene (C) | | |

| 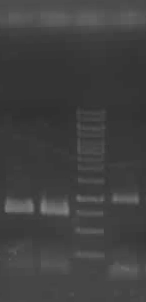  M 1  500  1000  2000  bp  750 | 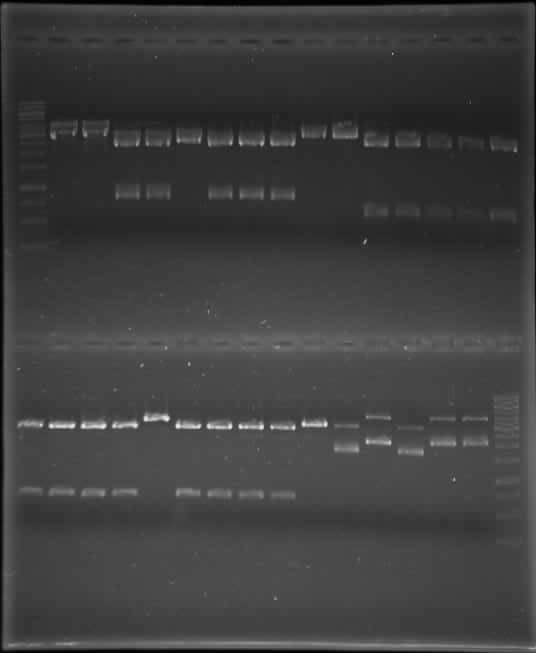 M 1 2 3 4 5 6 7 8  bp  1000  2000  500 |
| --- | --- |
| A | B |
| **Supplement 2.** PCR gene *xlnG2* product (A); Cutting plasmid with *Bam*HI: 1 and 2 are control, 3-8 are samples. (B) | |

| 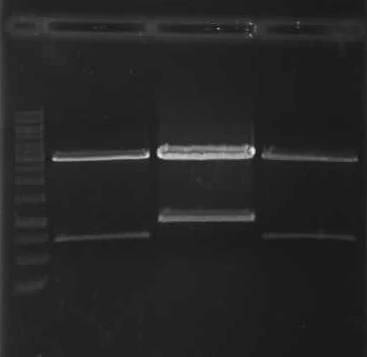 M 1  500  bp  1000  2000  750 | 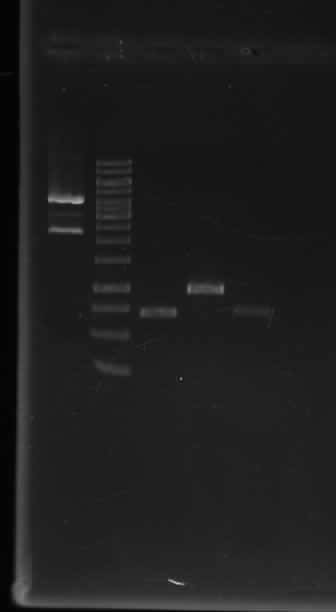 500  bp  1000  2000  M 1  750 | 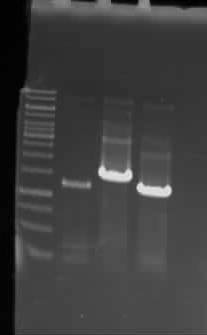 500  bp  1000  2000  M 1  750 |
| --- | --- | --- |
| A | B | C |
| **Supplement 3.** (A), DNA electrophoresis products; pGEMT/*xlnG2*/*Bam*HI, (B) Purified *xlnG2* gene (C) PCR product from plasmid pANxlnG2. | | |

| 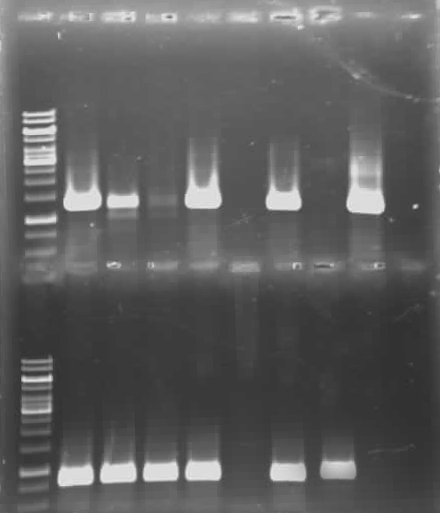 M 1 2 3 4 5 6 7 8  bp  500  2000  750  1000 | 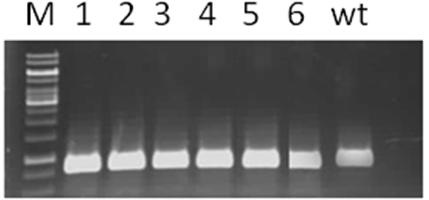  M 1 2 3 4 5 6 7 8  bp  500  750 |
| --- | --- |
| A | B |
| **Supplement 4.** PCR products with DNA templates of recombinant strain and wild-type strain (A) M: Marker; 16, DNA template from recombinant strains; 7: wild-type strain; 8: from plasmid pANxlnG2; (B) PCR products with primer pair xlnG2F/xlnG2R | |
